# Supplementary material
Source: publisher figshare collection journal article supplement (https://geolsoc.figshare.com/ndownloader/files/5421851)
Supplement: Supplementary file 1 [file 5421851]

Appendix 1. Raw time series data for the entire Triassic sequence of England and Wales
UNIT	UNIT_N	THICKNESS	OUTCROP	VOLUME	COASTOUTCROP	QUARRIES	ACTIVEQUARRIES	PUBLICATIONS	ALLPUBLICATIONS	AUTHORS	ALLAUTHORS	GENERA	SPECIES
AYLESBEARE MUDSTONE GROUP	AYB	493	232	114.38	3	62	0	1	5	1	13	10	6
KINNERTON AND LENTON SANDSTONE FORMATIONS	KNSF_LNS	289	679	196.23	11	77	0	0	5	0	17	0	0
LOWER SHERWOOD SANDSTONE	SBS_KDM_CPB	790	2309	1824.11	105	943	17	8	29	19	54	10	4
MIDDLE SHERWOOD SANDSTONE	WLSF_WRS_NTC_HAW_BSP	837	3926	3286.06	98	860	32	8	58	18	76	12	4
UPPER SHERWOOD SANDSTONE	OS_MOS_KIS_HEY_BMS	718	1543	1107.87	63	832	8	55	107	81	134	118	149
TARPORLEY SILTSTONE FORMATION	TPSF	108	453	48.92	1	213	6	26	40	50	65	72	76
SIDMOUTH MUDSTONE FORMATION	SIM	570	8447	4814.79	264	2694	19	18	25	24	36	67	83
ARDEN SANDSTONE FORMATION	AS	9	133	1.2	1	55	0	23	35	28	50	74	68
BRANSCOMBE MUDSTONE FORMATION	BCMU	120	2467	296.04	71	743	6	6	14	7	22	46	52
BLUE ANCHOR FORMATION	BAN	17	169	2.87	3	28	0	22	28	39	52	102	65
PENARTH GROUP	PNG	10	1066	10.66	19	159	0	121	163	134	169	332	364
